# Supplementary material for: Testis development in the Japanese eel is affected by photic signals through melatonin secretion
Source: PeerJ. 2021 Oct 15;9:e12289. doi: 10.7717/peerj.12289 (PMC8522646; doi:10.7717/peerj.12289)
Supplement: Supplemental Information 1 [file peerj-09-12289-s001.xlsx]

## Sheet: Fig. 2
	Eye melatonin levels
	Light-Dark condition (LD, 12L12D)									Constant dark condition (DD)									Constant light condition (LL)
	CT9	CT13	CT17	CT21	CT1	CT5	CT9			CT9	CT13	CT17	CT21	CT1	CT5	CT9			CT9	CT13	CT17	CT21	CT1	CT5	CT9
1	280.396	275.648	302.096	195.102	1367.32	587.118	660.808			223.718	311.594	606.754	333.268	1651.88	2638.6	640.502		1	423.544	154.507	181.641	208.714	106.739	214.904	136.672
2	226.468	373.38	325.788	824.842	1380.57	975.254	275.648			1034.86	790.48	526.054	541.108	1459.98	9753.08	1323.1		2	776.7	987.266	364.812	144.535	65.2564	159.727	222.088
3	244.856	214.262	595.198	806.062	1746.83	629.042	203.88			404.392	624.648	3052.02	491.526	746.778	3202.06	688.182		3	468.762	204.19	568.134	461.452	107.154	194.006	1111.95
4	291.848	404.036	107.689	620.344	1407.64	611.808	274.086			740.326	596.808	499.402	599.276	3663.96	13919.5	1911.45		4	530.304	90.4504	252.446	80.7126	121.147	211.786	239.82
5	303.846	362.354	223.968	123.757	758.796	220.274				577.504	808.138	837.438	904.294	2074.16	4529.1			5	1025.11	267.732	495.446	450.734	125.825	196.145
	Plasma melatonin levels
	Light-Dark condition (LD, 12L12D)									Constant dark condition (DD)									Constant light condition (LL)
	CT9	CT13	CT17	CT21	CT1	CT5	CT9			CT9	CT13	CT17	CT21	CT1	CT5	CT9			CT9	CT13	CT17	CT21	CT1	CT5	CT9
1	95.9604	64.4026	31.7748	65.1734	240.126	187.495	90.2832		1	128.685	229.128	124.773	153.563	138.482	264.468	91.3702		1	93.9922	20.9658	83.9672	70.4814	86.1956	41.9256	101.928
2	80.3534	114.075	114.187	70.0594	196.614	100.709	112.032		2	220.758	89.4902	94.2118	82.1286	377.788	209.526	109.278		2	85.2276	71.81	78.0856	65.9892	105.834	98.7366	89.1542
3	112.858	93.4554	104.051	79.9632	867.658	190.987	146.204		3	116.55	102.461	90.7408	88.122	717.122	211.788	166.649		3	100.787	83.1128	68.5456	80.5556	125.896	109.353	129.624
4	157.005	87.29	110.42	75.7816	890.2	443.484	81.6556		4	102.018	130.932	121.792	81.284	255.142	253.32	74.859		4	83.5584	71.7516	105.46	69.3418	107.118	133.981
5	150.247		118.541	166.254					5	109.755	122.491		91.4464		186.496			5	137.678	41.799	156.107	77.2504	128.353	67.1256
Eye melatonin levels
	Light-Dark condition (LD, 12L12D)									Constant dark condition (DD)									Constant light condition (LL)
Fig. 2A	CT9	CT13	CT17	CT21	CT1	CT5	CT9		Fig. 2B	CT9	CT13	CT17	CT21	CT1	CT5	CT9		Fig. 2C	CT9	CT13	CT17	CT21	CT1	CT5	CT9
av	269.483	325.936	310.948	514.021	1332.23	604.699	353.606			596.16	626.334	1104.33	573.894	1919.35	6808.48	1140.81			644.884	340.829	372.496	269.229	105.224	195.314	427.632
stdev	32.6224	78.5442	180.261	334.372	357.063	267.416	207.519			311.881	199.958	1096.89	209.505	1086.87	4868.97	600.638			252.531	367.185	161.468	176.524	23.882	21.9312	458.428
count	5	5	5	5	5	5	4			5	5	5	5	5	5	4			5	5	5	5	5	5	4
sem	14.5892	35.126	80.6153	149.536	159.684	119.592	103.759			139.477	89.4238	490.543	93.6933	486.061	2177.47	300.319			112.935	164.21	72.2106	78.9439	10.6804	9.80795	229.214
ANOVA summary									ANOVA summary									ANOVA summary
F	12.22								F	6.41								F	2.456
P value	<0.0001								P value	0.0003								P value	0.0503
P value summary	****								P value summary	***								P value summary	ns
Significant diff. among means (P < 0.05)?	Yes								Significant diff. among means (P < 0.05)?	Yes								Significant diff. among means (P < 0.05)?	No
R squared	0.7308								R squared	0.5875								R squared	0.3531
ANOVA table	SS	DF	MS	F (DFn, DFd)	P value				ANOVA table	SS	DF	MS	F (DFn, DFd)	P value				ANOVA table	SS	DF	MS	F (DFn, DFd)	P value
Treatment (between columns)	4158042	6	693007	F (6, 27) = 12.22	P<0.0001				Treatment (between columns)	151236853	6	25206142	F (6, 27) = 6.410	P=0.0003				Treatment (between columns)	904793	6	150799	F (6, 27) = 2.456	P=0.0503
Residual (within columns)	1531343	27	56716						Residual (within columns)	106172226	27	3932305						Residual (within columns)	1657990	27	61407
Total	5689385	33							Total	257409078	33							Total	2562783	33
Plasma melatonin levels
	Light-Dark condition (LD, 12L12D)									Constant dark condition (DD)									Constant light condition (LL)
Fig. 2D	CT9	CT13	CT17	CT21	CT1	CT5	CT9		Fig. 2E	CT9	CT13	CT17	CT21	CT1	CT5	CT9		Fig. 2F	CT9	CT13	CT17	CT21	CT1	CT5	CT9
av	119.285	89.8059	95.7945	91.4463	548.65	230.669	107.544			135.553	134.9	107.879	99.3088	372.134	225.12	110.539			100.249	57.8878	98.4332	72.7237	110.679	90.2244	106.902
stdev	33.4756	20.4449	36.1809	42.1933	381.898	147.895	28.7684			48.627	55.143	17.8837	30.6207	249.886	32.6199	39.9599			22.0488	25.7119	34.9722	5.99267	17.1723	36.1226	20.6884
count	5	4	5	5	4	4	4			5	5	4	5	4	5	4			5	5	5	5	5	5	3
sem	14.9707	10.2225	16.1806	18.8694	190.949	73.9473	14.3842			21.7467	24.6607	8.94183	13.694	124.943	14.5881	19.98			9.86053	11.4987	15.64	2.68	7.67968	16.1545	11.9444
ANOVA summary									ANOVA summary									ANOVA summary
F	5.345								F	4.583								F	2.702
P value	0.0013								P value	0.0029								P value	0.0357
P value summary	**								P value summary	**								P value summary	*
Significant diff. among means (P < 0.05)?	Yes								Significant diff. among means (P < 0.05)?	Yes								Significant diff. among means (P < 0.05)?	Yes
R squared	0.572								R squared	0.5238								R squared	0.384
ANOVA table	SS	DF	MS	F (DFn, DFd)	P value				ANOVA table	SS	DF	MS	F (DFn, DFd)	P value				ANOVA table	SS	DF	MS	F (DFn, DFd)	P value
Treatment (between columns)	699874	6	116646	F (6, 24) = 5.345	P=0.0013				Treatment (between columns)	244946	6	40824	F (6, 25) = 4.583	P=0.0029				Treatment (between columns)	10524	6	1754	F (6, 26) = 2.702	P=0.0357
Residual (within columns)	523734	24	21822						Residual (within columns)	222707	25	8908						Residual (within columns)	16880	26	649.2
Total	1223607	30							Total	467653	31							Total	27404	32

## Sheet: Fig. 3.
	Eye melatonin levles
	Long-day (14L10D)								Short-day (10L14D)
	CT8	CT12	CT16	CT20	CT24	CT4			CT8	CT12	CT16	CT20	CT24	CT4
1	768.12	411.714	824.584	345.458	637.718	2945.3		1	905.864	816.712	1565.7	774.142	1625.2	1513.95
2	714.073	478.271	1087.12	393.326	2060.67	1091.41		2	500.293	649.08	637.163	1259.61	1690.14	1592.9
3	467.274	498.306	1822.81	525.23	759.469	2138.13		3	658.814	921.936	477.611	777.416	1720.79	2504.47
4	444.599	1087.3	1959.38	1692.9	1601.67	1365.06		4	640.499	669.93	1001.06	709.866	2523.86	4628.34
5	813.016	491.552	1273.71	687.798	1472.88	2765.08		5	698.209	669.994	1103.98	609.182	4055.54	2132.38
6	603.762	737.231	380.627	1953.18	1768.78			6		1174.12	2359.2	1627.33	2196.05	2419.98
	Plasma melatonin levles
	Long-day (14L10D)								Short-day (10L14D)
	CT8	CT12	CT16	CT20	CT24	CT4			CT8	CT12	CT16	CT20	CT24	CT4
1	80.086	158.8	107.893	106.187	218.977	106.324		1	211.301	275.178	231.084	218.867	484.09	204.499
2	202.092	438.7	110.499	145.418	148.496	172.033		2	222.397	230.156	297.884	340.048	524.608	407.28
3	135.226	162.938	129.802	165.207	160.709	79.2875		3	186.239	182.818	147.144	275.472	601.261	290.913
4	150.777	72.3118	178.347	275.4	106.652	143.766		4	292.519	168.706	322.232	178.452	315.502	270.231
5	79.2125	163.412	209.312	104.776	221.569	118.818		5	211.542	85.079	319.627	213.062	160.9	173.761
6	117.991	77.4409			167.601	111.851		6	108.338	167.32	499.4		228.174	414.462
Eye melatonin levles
	Long-day (14L10D)
Fig. 3A	CT8	CT12	CT16	CT20	CT24	CT4		ANOVA summary		ANOVA table	DF	F (DFn, DFd)	P value
av	635.141	617.397	1224.71	932.982	1383.53	2060.99		F	5.164	Treatment (between columns)	5	F (5, 29) = 5.164	P=0.0017
stdev	155.579	255.677	598.561	704.424	567.133	822.816		P value	0.0017	Residual (within columns)	29
count	6	6	6	6	6	5		P value summary	**	Total	34
sem	63.5147	104.38	244.361	287.58	231.531	367.974		Significant diff. among means (P < 0.05)?	Yes
								R squared	0.471
	Short-day (10L14D)
	CT8	CT12	CT16	CT20	CT24	CT4		ANOVA summary		ANOVA table	DF	F (DFn, DFd)	P value
av	680.736	816.962	1190.78	959.59	2301.93	2465.34		F	7.233	Treatment (between columns)	5	F (5, 29) = 7.233	P=0.0002
stdev	146.328	204.931	687.663	397.143	927.962	1136.6		P value	0.0002	Residual (within columns)	29
count	5	6	6	6	6	6		P value summary	***	Total	34
sem	65.4398	83.6628	280.737	162.133	378.839	464.015		Significant diff. among means (P < 0.05)?	Yes
								R squared	0.555
Unpaired t test
P value	0.6312	0.1666	0.9292	0.9374	0.0654	0.5248
P value summary	ns	ns	ns	ns	ns	ns
Significantly different (P < 0.05)?	No	No	No	No	No	No
One- or two-tailed P value?	Two-tailed	Two-tailed	Two-tailed	Two-tailed	Two-tailed	Two-tailed
t, df	t=0.4969, df=9	t=1.492, df=10	t=0.09114, df=10	t=0.08060, df=10	t=2.069, df=10	t=0.6616, df=9
Plasma melatonin levels
	Long-day (14L10D)
Fig. 3B	CT8	CT12	CT16	CT20	CT24	CT4		ANOVA summary		ANOVA table	DF	F (DFn, DFd)	P value
av	127.564	178.934	147.171	159.398	170.667	122.013		F	0.6165	Treatment (between columns)	5	F (5, 28) = 0.6165	P=0.6882
stdev	46.5524	134.201	44.7848	69.8223	43.87	32.1256		P value	0.6882	Residual (within columns)	28
count	6	6	5	5	6	6		P value summary	ns	Total	33
sem	19.0049	54.7874	20.0284	31.2255	17.9099	13.1152		Significant diff. among means (P < 0.05)?	No
								R squared	0.09917
	Short-day (10L14D)
	CT8	CT12	CT16	CT20	CT24	CT4		ANOVA summary		ANOVA table	DF	F (DFn, DFd)	P value
av	205.389	184.876	302.895	245.18	385.756	293.524		F	2.849	Treatment (between columns)	5	F (5, 29) = 2.849	P=0.0327
stdev	59.564	64.402	117.225	63.4313	176.477	100.384		P value	0.0327	Residual (within columns)	29
count	6	6	6	5	6	6		P value summary	*	Total	34
sem	24.3169	26.292	47.8569	28.3673	72.0462	40.9815		Significant diff. among means (P < 0.05)?	Yes
								R squared	0.3294
Unpaired t test
P value	0.0303	0.924	0.0212	0.0765	0.0159	0.0026
P value summary	*	ns	*	ns	*	**
Significantly different (P < 0.05)?	Yes	No	Yes	No	Yes	Yes
One- or two-tailed P value?	Two-tailed	Two-tailed	Two-tailed	Two-tailed	Two-tailed	Two-tailed
t, df	t=2.522, df=10	t=0.09779, df=10	t=2.785, df=9	t=2.033, df=8	t=2.897, df=10	t=3.986, df=10

## Sheet: Fig. 4.
	Histological observation of testis development
				BW	TL	GW	GSI	Testis developmental stage
	Fig. 4a) Freshwater acclimation			191.98	50.2	0.42	0.218773	Spermatogonia, spermatocyte
	Fig. 4b) Seawater acclimation			186.1	47.2	0.34	0.182697	Spermatogonia, spermatocyte
	Fig. 4c) Full moon (FM, hCG-)			286	54.5	1.05	0.367133	Spermatogonia, spermatocyte
	Fig. 4d) New moon (NM, hCG-)			210	51	1.01	0.480952	Spermatogonia, spermatocyte
	Fig. 4e) Full moon (FM, hCG+)			335	57.6	86	25.6716	Spermatozoa
	Fig. 4f) New moon (NM, hCG+)			403	65	120	29.7767	Spermatozoa

## Sheet: Fig. 5.
	Initial (Freshwater)									Initial (Seawater)
	BW	TL	Eye size(L)	Eye size(R)	GW	GSI	EI			BW	TL	Eye size(L)	Eye size(R)	GW	GSI	EI
1	191.98	51.5	4.28	4.03	0.26	0.135431	2.63151		1	208.58	51.5	4.95	5.08	0.42	0.201362	3.83358
2	191.98	50.2	4.53	4.37	0.42	0.218773	3.09661		2	186.1	47.2	4.46	4.36	0.34	0.182697	3.23448
3	191.98	52.3	4.78	4.71	0.66	0.343786	3.37941		3	227.1	51.7	4.86	4.47	0.52	0.228974	3.30432
4	191.98	52	4.71	4.09	0.28	0.145849	2.92262		4	197.8	49.4	4.93	4.54	0.42	0.212336	3.56273
5	191.98	47.6	5	4.51	0.3	0.156266	3.72875		5	221.2	51	4.87	4.47	0.5	0.22604	3.35686
6	191.98	48.3	4.52	4.24	0.24	0.125013	3.11796		6	221.8	50.7	4.93	4.6	0.3	0.135257	3.5155
7	191.98	52.4	4.77	4.75	0.28	0.145849	3.39432		7	205.3	49	4.77	4.62	0.62	0.301997	3.53138
8	191.98	52.5	4.45	4.49	0.46	0.239608	2.98762		8	165.2	47.2	4.93	4.72	0.52	0.31477	3.87188
9	191.98	50.3	4.36	4.16	0.3	0.156266	2.83218		9	107.6	50	4.96	4.76	0.44	0.408922	3.70828
	New moon (hCG+)									New moon (hCG-)
	BW	TL	Eye size(L)	Eye size(R)	GW	GSI	EI			BW	TL	Eye size(L)	Eye size(R)	GW	GSI	EI
1	344	62.5	7.26	7.28	93.33	27.1308	6.63832		1	210	51	4.89	4.63	1.01	0.480952	3.48749
2	403	65	7.59	7.21	120	29.7767	6.61332		2	199	49.8	4.55	4.32	0.46	0.231156	3.10047
3	345	60.1	7.21	7.16	72.24	20.9391	6.74293		3	202	49.5	5.06	5	1.04	0.514851	4.01236
4	367	61	7.26	7.28	86.35	23.5286	6.80156		4	235	53.2	5.1	5.02	0.62	0.26383	3.77797
5	286	58	7.06	6.63	81.92	28.6434	6.34145		5	199	51.1	4.78	4.45	0.57	0.286432	3.27184
6	360	61.2	7.55	7	51.94	14.4278	6.78866
7	382	63	7.73	6.57	93.23	24.4058	6.37003
8	360	58.5	6.96	6.47	69	19.1667	6.0507
9	313	62	7.36	6.74	88.27	28.2013	6.29298
	Full moon (hCG+)								Full moon (hCG-)
	BW	TL	Eye size(L)	Eye size(R)	GW	GSI	EI			BW	TL	Eye size(L)	Eye size(R)	GW	GSI	EI
1	534	61	7.33	6.78	88	16.4794	6.40522		1	286	54.5	5.16	5.1	1.05	0.367133	3.7906
2	257	58.4	7.35	7.03	37	14.3969	6.94888		2	209	54.7	5.09	5.01	0.45	0.215311	3.65987
3	305	62.3	7.23	7.35	46	15.082	6.69633		3	219	52.5	5.24	5.01	1.01	0.461187	3.92734
4	264	59	7.56	6.82	50	18.9394	6.87821		4	171	45.2	4.93	4.71	0.51	0.298246	4.03483
5	335	57.6	6.5	5.8	86	25.6716	5.15463		5	215	53	4.56	4.5	0.46	0.213953	3.03942
6	247	56.2	7.07	6.95	25	10.1215	6.86388
7	313	62	7.14	6.85	47	15.016	6.19517
8	295	58.2	7.51	6.98	42	14.2373	7.07984
9	255	60.7	7.01	6.33	81	31.7647	5.75351
	GSI
Fig. 5A			HCG-		HCG+			ANOVA summary		ANOVA table	SS	DF	MS	F (DFn, DFd)	P value
	FW	SW	NM	FM	NM	FM		F	69.04	Treatment (between columns)	4877	5	975.5	F (5, 40) = 69.04	P<0.0001
av	0.187778	0.245556	0.354	0.312	24.0256	17.9678		P value	<0.0001	Residual (within columns)	565.2	40	14.13
stdev	0.0679665	0.0817177	0.130882	0.105214	5.08718	6.68908		P value summary	****	Total	5443	45
count	9	9	5	5	9	9		Significant diff. among means (P < 0.05)?	Yes
sem	0.0226555	0.0272392	0.058532	0.0470532	1.69573	2.22969		R squared	0.8962
	EI
Fig. 5B			HCG-		HCG+			ANOVA summary		ANOVA table	SS	DF	MS	F (DFn, DFd)	P value
	FW	SW	NM	FM	NM	FM		F	130.6	Treatment (between columns)	103.1	5	20.61	F (5, 40) = 130.6	P<0.0001
av	3.12111	3.54556	3.53	3.69	6.51444	6.44222		P value	<0.0001	Residual (within columns)	6.313	40	0.1578
stdev	0.334307	0.226004	0.369797	0.389423	0.26235	0.642841		P value summary	****	Total	109.4	45
count	9	9	5	5	9	9		Significant diff. among means (P < 0.05)?	Yes
sem	0.111436	0.0753346	0.165378	0.174155	0.0874502	0.21428		R squared	0.9423

## Sheet: Fig. 6.
	Eye melatonin levels								Plasma melatonin levels
			hCG-		hCG+						hCG-		hCG+
	Freshwater	Seawater	NM	FM	NM	FM			Freshwater	Seawater	NM	FM	NM	FM
1	941.73	1545.27	1994.64	251.616	3881.98	964.183		1	136.689	58.4944	430.301	339.474	919.534	280.237
2	1001.05	947.099	396.048	289.307	16744.5	3887.65		2	70.9832	74.1384	373.5	506.741	910.119	717.545
3	956.774	1471.09	9.84722	695.324	8418.84	2360.02		3	106.17	789.065	628.9	1718.89	1584.55	426.644
4	954.2	602.558	25.5439	825.079	10312.2	1974		4	241.812	132.612	288.122	317.05	891.153	543.256
5	935.475	486.394	57.2361	840.91	3250.71	1514.79		5	535.821	108.225	401.893	379.757	1372.08	545.173
6	955.227	496.703			5357.84	835.064		6	121.723	61.7559			1630.01	439.237
7	825.534	1015.7			15232.9	2145.16		7	105.988	37.5374			1158.22	291.991
8	1233.81	920.136				4301.63		8	410.409	264.398			1419.96	259.423
9	716.591	517.346						9	134.627				1196.06
	Eye melatonin levels
Fig. 6A			HCG-		HCG+			ANOVA summary		ANOVA table	SS	DF	MS	F (DFn, DFd)	P value
	FW	SW	NM	FM	NM	FM		F	14.93	Treatment (between columns)	381956974	5	76391395	F (5, 37) = 14.93	P<0.0001
av	946.711	889.144	496.62	580.44	9028.41	2247.82		P value	<0.0001	Residual (within columns)	189299851	37	5116212
stdev	138.475	407.145	852.365	288.872	5375.78	1264.13		P value summary	****	Total	571256825	42
count	9	9	5	5	7	8		Significant diff. among means (P < 0.05)?	Yes
sem	46.1583	135.715	381.189	129.188	2031.86	446.936		R squared	0.6686
	Plasma melatonin levels
Fig. 6B			HCG-		HCG+			ANOVA summary		ANOVA table	SS	DF	MS	F (DFn, DFd)	P value
	FW	SW	NM	FM	NM	FM		F	16.43	Treatment (between columns)	6483614	5	1296723	F (5, 38) = 16.43	P<0.0001
av	207.133	190.775	424.54	652.4	1231.31	437.925		P value	<0.0001	Residual (within columns)	2999488	38	78934
stdev	160.861	252.092	126.026	600.686	287.631	159.887		P value summary	****	Total	9483101	43
count	9	8	5	5	9	8		Significant diff. among means (P < 0.05)?	Yes
sem	53.6203	89.1281	56.3603	268.635	95.8771	56.5285		R squared	0.6837
